# Supplementary material
Source: MDPI journal article supplement (https://www.mdpi.com/2071-1050/16/6/2348)
Supplement: s1 [file s1]

# Life Cycle Assessment of the Domestic Micro Heat and Power Generation Proton Exchange Membrane Fuel Cell in Comparison with the Gas Condensing Boiler Plus Electricity from the Grid

Lyubov Slotyuk <sup>1</sup>, Florian Part <sup>2</sup>, Moritz-Caspar Schlegel <sup>1</sup> and Floris Akkerman <sup>1,\*</sup>

<sup>1</sup> Fachbereich Ökodesign und Energieverbrauchskennzeichnung, Bundesanstalt für Materialforschung und -Prüfung (BAM), Unter den Eichen 82, 12203 Berlin, Germany; lyubov.slotyuk@bam.de (L.S.); moritz-caspar.schlegel@bam.de (M.-C.S.)

<sup>2</sup> Department of Water-Atmosphere-Environment, Institute of Waste Management and Circularity, University of Natural Resources and Life Sciences, Muthgasse 107, 1190 Vienna, Austria; florian.part@boku.ac.at

\* Correspondence: floris.akkerman@bam.de

## Content:

- A) Methods and analysis settings
- B) Life cycle inventory of the PEMFC system
- C) Parameterized GaBi-model of the manufacturing phase of the energy supply system
- D) Parameterized GaBi-model of the use phase of the energy supply system
- E) Parameterized GaBi-model of the End-of-Life phase of the energy supply system
- F) Key parameters for the description of the energy supply system of a single-family house in Germany
- G) Assumptions for the use phase: basis scenario and sensitivity scenarios (old and new building types)
- H) Life cycle assessment results – basis scenario
- I) Life cycle assessment results – sensitivity scenarios

## A) Methods and Scenarios settings

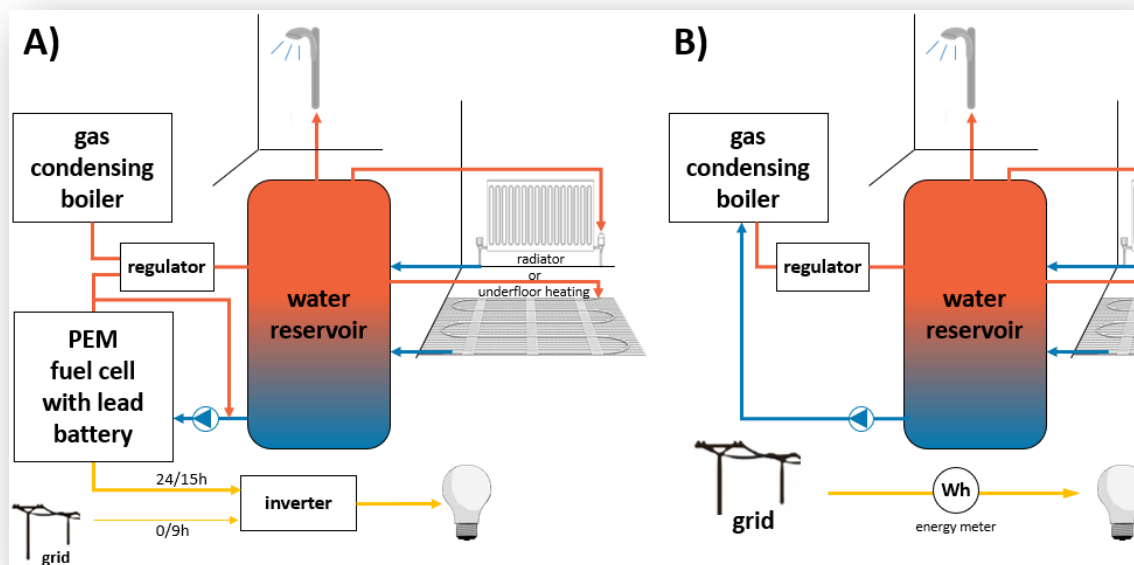

**Figure S1.** A) Investigated innovative energy supply system consisting of the proton-exchange-membrane fuel cell (PEMFC), gas condensing boiler, water reservoir, under floor heating (alternatively radiators), inverter (full load operation of the PEMFC in the basis and old building scenario and part load operation (15 h/day) in the new building scenario); B) Investigated conventional energy supply system consisting of stand-alone gas condensing boiler, water reservoir, under floor heating (alternatively radiators).

## B) Life cycle inventory of the PEMFC system

**Table S1.** Life cycle inventory of the PEMFC system

| PEMFC                    |            |                                                                                                                                                                         |
|--------------------------|------------|-------------------------------------------------------------------------------------------------------------------------------------------------------------------------|
| Stack                    |            |                                                                                                                                                                         |
| Material                 | Value      | GaBi Dataset                                                                                                                                                            |
| Polybenzimidazole        | 0.270 kg   | DE Glass fibres agg Sphera 01.03.2022<br>DE Pelletizing and compounding e-ep Sphera 01.03.2022<br>GLO Plastic injection moulding (parameterized) e-ep Sphera 01.03.2022 |
| Phosphoric acid          | 0.075 kg   | EU-28 Phosphoric acid (H3PO4. 54% P2O5) agg 01.03.2022                                                                                                                  |
| Carbon fiber             | 0.090 kg   |                                                                                                                                                                         |
| Ammonia                  | 0.0111 kg  | EU-28 Ammonia (NH3) production mix. without CO2 recovery (carbon dioxide emissions to air) agg Sphera 01.03.2022                                                        |
| Propylene                | 0.0283 kg  | EU-28 Propylene agg PlasticsEurope 01.03.2022<br>production mix. at plant                                                                                               |
| Acrylonitrile            | 0.0232 kg  | RER Acrylonitrile (AN) agg PlasticsEurope 01.03.2022<br>technology mix                                                                                                  |
| Methyl methacrylate      | 0.00117 kg | RER Methyl methacrylate (MMA) agg PlasticsEurope 01.03.2022<br>technology mix                                                                                           |
| Polyacrylonitrile Fibres | 0.0244 kg  | EU-28 Polyacrylonitrile Fibres (PAN) agg Sphera 01.03.2022<br>Polymerization. dissolving. spinning                                                                      |
| Natural gas              | 0.00177 kg | EU-28 Natural gas mix agg Sphera 01.03.2022<br>technology mix                                                                                                           |
| Electricity              | 0.9 MJ     | EU-28 Electricity grid mix (production mix) Mfg Sphera 01.03.2022                                                                                                       |
| Platinum                 | 0.0075 kg  | GLO Platinum mix agg Sphera 01.03.2022<br>production primary                                                                                                            |
| Carbon black             | 0.075 kg   | DE Carbon black (furnace black; general purpose) (economic allocation) agg Sphera 01.03.2022                                                                            |

|                                              |                 |                                                                                                                                                                                                       |
|----------------------------------------------|-----------------|-------------------------------------------------------------------------------------------------------------------------------------------------------------------------------------------------------|
| Synthetic graphite                           | 1.8 kg          | DE Carbon black (furnace black; general purpose) (economic allocation) agg Sphera 01.03.2022<br>Graphitization e-cp 18.10.2021<br>DE Electricity grid mix agg Sphera 01.03.2022<br>AC. technology mix |
| Polytetrafluoroethylene                      | 0.0225 kg       | EU-28 Polyethylene. HDPE. granulate agg PlasticsEurope<br>01.03.2022 production mix. at plant                                                                                                         |
| Aluminium ingot                              | 0.210 kg        | DE Aluminium ingot mix agg Sphera 01.03.2022<br>primary production                                                                                                                                    |
| Gold (primary)                               | 0.00027 kg      | GLO Gold (primary) agg Sphera 01.03.2022 primary<br>route                                                                                                                                             |
| Stainless Steel                              | 0.060 kg        | DE Stainless Steel slab (X6CrNi17) t-agg Sphera<br>01.03.2022 EAF route                                                                                                                               |
| <b>Total</b>                                 | <b>2.610 kg</b> |                                                                                                                                                                                                       |
| <b>BoP Components</b>                        |                 |                                                                                                                                                                                                       |
| Aluminium ingot                              | 20.4 kg         | DE Aluminium ingot mix agg Sphera 01.03.2022<br>primary production                                                                                                                                    |
| Stainless steel                              | 6.5 kg          | DE Stainless Steel slab (X6CrNi17) t-agg Sphera<br>01.03.2022 EAF route                                                                                                                               |
| Cast iron                                    | 0.6 kg          | DE Cast iron component (EN15804 A1-A3) t-agg Sphera<br>01.03.2022 EAF route                                                                                                                           |
| Copper                                       | 0.1 kg          | GLO Copper mix (99.999% from electrolysis) agg Sphera<br>01.03.2022 from electrolysis                                                                                                                 |
| Reformer Catalyst – TMs based                | 2.5 kg          |                                                                                                                                                                                                       |
| Nickel oxide                                 | 0.060 kg        | GLO Nickel (Class 1. >99.8% Nickel) agg Nickel Institute<br>01.03.2022 technology mix<br>DE Oxygen (liquid) agg Sphera 01.03.2022 via<br>cryogenic air separation                                     |
| Bauxite                                      | 5.260 kg        | EU-28 Bauxite agg Sphera 01.03.2022 technology mix                                                                                                                                                    |
| Quicklime                                    | 0.0738 kg       | EU-27 Quicklime agg EuLa 01.03.2022<br>Quicklime. granular or powder. free CaO from 89.5% to 97.5%.<br>stored in silos. ready to be shipped                                                           |
| Electricity                                  | 0.749 MJ        | DE Electricity grid mix agg Sphera 01.03.2022<br>AC. technology mix                                                                                                                                   |
| Sodium hydroxide                             | 0.116 kg        | DE Sodium hydroxide (caustic soda) mix (100%) agg<br>Sphera 01.03.2022 technology mix                                                                                                                 |
| Thermal energy from heavy fuel oil           | 0.0772 MJ       | DE Thermal energy from heavy fuel oil (HFO) agg Sphera<br>01.03.2022 technology mix regarding firing and flue gas<br>cleaning                                                                         |
| Thermal energy from light fuel oil           | 0.00497 MJ      | DE Thermal energy from light fuel oil (LFO) agg Sphera<br>01.03.2022 technology mix regarding firing and flue gas<br>cleaning                                                                         |
| Thermal energy from natural gas              | 18.1 MJ         | DE Thermal energy from natural gas agg Sphera<br>01.03.2022 technology mix regarding firing and flue gas<br>cleaning                                                                                  |
| Process steam from natural gas               | 0.102 MJ        | DE Process steam from natural gas 90% agg Sphera<br>01.03.2022 technology mix regarding firing and flue gas<br>cleaning                                                                               |
| Heating control unit                         | 1 piece         |                                                                                                                                                                                                       |
| Liquid Crystal Display                       | 0.0105 sqm      | GLO Liquid Crystal Display (LCD). Panel Assembly LED TFT.<br>mixed TN-IPS technology (mobile phone). in sqm agg Sphera<br>01.03.2022                                                                  |
| Printed wiring board with signal electronics | 0.056 sqm       | GLO Average Printed Wiring Board with Signal Electronics (DfX-compatible) agg Sphera 01.03.2022 Production of<br>signal electronics on base of FR4 substrate                                          |
| Polyamide 6                                  | 0.6 kg          | EU-28 Polyamide 6 (PA6) agg PlasticsEurope<br>01.03.2022 1 kg of primary PA6 “at gate” (production<br>site output) representing a European industry production average. in<br>pellet form             |
| Steel plate                                  | 7.6 kg          | EU Steel plate agg worldsteel 01.07.2022<br>blast furnace route and electric arc furnace route                                                                                                        |

|                                 |               |                                                                                                                                                                                                          |
|---------------------------------|---------------|----------------------------------------------------------------------------------------------------------------------------------------------------------------------------------------------------------|
| Cable 3 wire                    | 1.75 kg       | EU-28 Cable 3 wire (EN15804 A1-A3) agg Sphera<br>01.03.2022 technology mix                                                                                                                               |
| Expanded Polystyrene            | 1.1 kg        | EU-28 Expanded Polystyrene (EPS) Foam (25 kg/m3. EN15804 A1-A3) agg Sphera 01.03.2022 styrene polymerization. foaming                                                                                    |
| Glass ceramic                   | 0.17 kg       | EU-28 Glass ceramic production agg Sphera 01.03.2022<br>Mixing. melting minerals and forming glass                                                                                                       |
| Platinum                        | 0.01 kg       | GLO Platinum mix agg Sphera 01.03.2022 primary production                                                                                                                                                |
| Triethylene glycol              | 2.5 kg        | EU-28 Triethylene glycol agg PlasticsEurope<br>01.03.2022 production mix. at plant                                                                                                                       |
| Steel plate                     | 150.0 kg      | EU Steel plate agg worldsteel 01.07.2022<br>blast furnace route and electric arc furnace route                                                                                                           |
| Polyethylene                    | 12.0 kg       | EU-28 Polyethylene. LDPE. granulate agg PlasticsEurope<br>01.03.2022 production mix. at plant<br>GLO Plastic injection moulding (parameterized) e-ep Sphera<br>01.03.2022 injection moulding             |
| Gold                            | 0.003 kg      | GLO Gold (primary) agg Sphera 01.03.2022 primary route. underground mining. underground mining and leaching                                                                                              |
| <b>Total weight</b>             | <b>206 kg</b> |                                                                                                                                                                                                          |
| <b>Lead Battery Pack</b>        |               |                                                                                                                                                                                                          |
| Lead                            | 80.4 kg       | DE Lead (99.995%) agg Sphera 01.03.2022 primary production                                                                                                                                               |
| Acrylonitrile butadiene styrene | 0.871 kg      | EU-28 Acrylonitrile butadiene styrene (ABS) agg<br>PlasticsEurope 01.03.2022                                                                                                                             |
| Brass                           | 0.201 kg      | EU-28 Brass (CuZn39Pb3) t-agg Sphera 01.03.2022                                                                                                                                                          |
| Glass ceramic                   | 0.1 kg        | EU-28 Glass ceramic production agg Sphera 01.03.2022<br>Mixing. melting minerals and forming glass                                                                                                       |
| Polypropylene Ethylene          | 0.062 kg      | DE Polypropylene / Ethylene Propylene Diene Elastomer Granulate (PP/EPDM. TPO. TPE-O) Mix agg Sphera<br>01.03.2022                                                                                       |
| Polyester resin                 | 0.699 kg      | DE Polyester Resin (unsaturated) (UP) agg Sphera<br>01.03.2022 esterification and polymerization. from propylene glycol. phthalic anhydride and styrene                                                  |
| Polypropylene                   | 0.489 kg      | DE Polypropylene GMT part agg Sphera 01.03.2022<br>hot rolling. from polypropylene and glass fibres                                                                                                      |
| Polyurethane                    | 0.034 kg      | RER Polyurethane rigid foam (PU) agg PlasticsEurope<br>01.03.2022 technology mix                                                                                                                         |
| Polyvinylchloride               | 1.3 kg        | RER Polyvinylchloride injection moulding part (PVC) agg<br>PlasticsEurope 01.03.2022 technology mix                                                                                                      |
| Sulphuric acid                  | 39.3 kg       | EU-28 Sulphuric acid (96%) agg Sphera 01.03.2022<br>concentrated. sulphur dioxide route                                                                                                                  |
| Styrene acrylonitrile           | 8.61 kg       | EU-28 Styrene acrylonitrile (SAN). a-Methyl styrene acrylonitrile (AMSAN) agg PlasticsEurope 01.03.2022                                                                                                  |
| <b>Total weight</b>             | <b>132 kg</b> |                                                                                                                                                                                                          |
| <b>Water Reservoir</b>          |               |                                                                                                                                                                                                          |
| Stainless steel                 | 95.4 kg       | EU-28 Stainless steel sheet (EN15804 A1-A3) t-agg Sphera<br>01.03.2022 EAF route - stainless steel production<br>GLO Steel sheet stamping and bending (5% loss) e-ep Sphera<br>01.03.2022 technology mix |
| Copper pipe                     | 21 kg         | EU-28 Copper pipe mix. bare (A1-A3) agg Sphera<br>01.03.2022 technology mix                                                                                                                              |
| Expanded Polystyrene foam       | 1.61 kg       | EU-28 Expanded Polystyrene (EPS) Foam (25 kg/m3. EN15804 A1-A3) agg Sphera 01.03.2022 styrene polymerization. foaming                                                                                    |
| <b>Total weight</b>             | <b>118 kg</b> |                                                                                                                                                                                                          |
| <b>Inverter (0.5 pieces) *</b>  |               |                                                                                                                                                                                                          |
| AlSi12(Cu)                      | 12.8 kg       | DE Aluminium ingot mix agg Sphera 01.03.2022<br>primary production<br>CN Magnesium agg Sphera 01.03.2022<br>technology mix, primary production                                                           |

|                          |           |                                                                                                                                                                                                                                                                                                                                                                                                                                                                                                                                                                                                                                                                                       |
|--------------------------|-----------|---------------------------------------------------------------------------------------------------------------------------------------------------------------------------------------------------------------------------------------------------------------------------------------------------------------------------------------------------------------------------------------------------------------------------------------------------------------------------------------------------------------------------------------------------------------------------------------------------------------------------------------------------------------------------------------|
|                          |           | GLO Silicon mix (99%) agg Sphera 01.03.2022<br>purified, electric arc furnace process, from quartz sand<br>GLO Ferro-manganese, refined (Ref. FeMn), 80 to 85 wt. % Mn, less than 1.5 wt % carbon agg Sphera 01.03.2022 primary production<br>GLO Copper (99.99%; cathode)agg ICA 01.03.2022<br>from pyrometallurgical (including secondary) and hydrometallurgical production<br>DE Aluminium cast machining e-ep Sphera 01.03.2022 technology mix                                                                                                                                                                                                                                   |
| Stainless steel          | 0.266 kg  | EU-28 Stainless steel sheet (EN15804 A1-A3) t-agg Sphera 01.03.2022 EAF route - stainless steel production<br>GLO Steel sheet stamping and bending (5% loss) e-ep Sphera 01.03.2022 technology mix                                                                                                                                                                                                                                                                                                                                                                                                                                                                                    |
| Polyamide (PA 6)         | 0.588 kg  | EU-28 Polyamide 6 (PA6) agg PlasticsEurope 01.03.2022 1 kg of primary PA6 “at gate” (production site output) representing a European industry production average, in pellet form {c3a53e26-b87f-4d41-bffa-785fc0ca4935}<br>GLO Plastic injection moulding (parameterized) e-ep Sphera 01.03.2022 injection moulding                                                                                                                                                                                                                                                                                                                                                                   |
| Copper                   | 0.0252 kg | GLO Copper mix (99,999% from electrolysis) agg Sphera 01.03.2022 from electrolysis                                                                                                                                                                                                                                                                                                                                                                                                                                                                                                                                                                                                    |
| Screws                   | 0.281 kg  | EU-28 Fixing material screws stainless steel (EN15804 A1-A3) agg Sphera 01.03.2022 technology mix                                                                                                                                                                                                                                                                                                                                                                                                                                                                                                                                                                                     |
| Signal electronics       | 0.186 sqm | GLO Average Printed Wiring Board with Signal Electronics (DfX-compatible) agg Sphera 01.03.2022 Production of signal electronics on base of FR4 substrate                                                                                                                                                                                                                                                                                                                                                                                                                                                                                                                             |
| Signal-power electronics | 0.156 sqm | GLO Average Printed Wiring Board with Signal Electronics (DfX-compatible) agg Sphera 01.03.2022 Production of signal electronics on base of FR4 substrate<br>GLO Average Printed Wiring Board with Power Electronics (DfX-compatible) agg Sphera 01.03.2022 production of power electronics on base of FR4 substrate                                                                                                                                                                                                                                                                                                                                                                  |
| Cable                    | 0.475 kg  | EU-28 Cable CAT 7 (EN15804 A1-A3) agg Sphera 01.03.2022 technology mix                                                                                                                                                                                                                                                                                                                                                                                                                                                                                                                                                                                                                |
| Plug (PA6)               | 1 piece   | EU-28 Plug (PA6) (EN15804 A1-A3) agg Sphera 01.03.2022 technology mix                                                                                                                                                                                                                                                                                                                                                                                                                                                                                                                                                                                                                 |
| Glue                     | 0.346 kg  | EU-28 Glue for gypsum boards (EN15804 A1-A3) agg Sphera 01.03.2022 technology mix                                                                                                                                                                                                                                                                                                                                                                                                                                                                                                                                                                                                     |
| Ring core coils          | 4 pieces  | DE Lead (99,995%) agg Sphera 01.03.2022 primary production<br>DE Ferro chrome high carbon, consumption mix agg Sphera 01.03.2022 primary production<br>DE Aluminium ingot mix agg Sphera 01.03.2022 primary production<br>DE Polycarbonate Granulate (PC) agg Sphera 01.03.2022 durable material, posgenation of Bisphenol A<br>DE Polyamide 6.6 Granulate (PA 6.6) Mix agg Sphera 01.03.2022 technology mix<br>DE Polyethylene High Density Granulate (HDPE/PE-HD) Mix agg Sphera 01.03.2022 technology mix<br>GLO Plastic injection moulding (parameterized) e-ep Sphera 01.03.2022 injection moulding<br>EU-28 Copper Wire Mix (Europe 2015) agg DKI/ECI 01.03.2022 technology mix |
| Checkbox Fronius         | 1.2 kg    |                                                                                                                                                                                                                                                                                                                                                                                                                                                                                                                                                                                                                                                                                       |
| AlSi12(Cu)               | 0.988 kg  | DE Aluminium ingot mix agg Sphera 01.03.2022 primary production<br>CN Magnesium agg Sphera 01.03.2022 technology mix, primary production<br>GLO Silicon mix (99%) agg Sphera 01.03.2022 purified, electric arc furnace process, from quartz sand                                                                                                                                                                                                                                                                                                                                                                                                                                      |

|                                               |                |                                                                                                                                                                                                                                                                                                                                       |
|-----------------------------------------------|----------------|---------------------------------------------------------------------------------------------------------------------------------------------------------------------------------------------------------------------------------------------------------------------------------------------------------------------------------------|
|                                               |                | GLO Ferro-manganese, refined (Ref. FeMn), 80 to 85 wt. % Mn, less than 1.5 wt % carbon agg Sphera 01.03.2022 primary production<br>GLO Copper (99.99%; cathode)agg ICA 01.03.2022 from pyrometallurgical (including secondary) and hydrometallurgical production<br>DE Aluminium cast machining e-ep Sphera 01.03.2022 technology mix |
| Screws                                        | 0.0233 kg      | EU-28 Fixing material screws stainless steel (EN15804 A1-A3) agg Sphera 01.03.2022 technology mix                                                                                                                                                                                                                                     |
| Signal-power electronics                      | 0.0244 sqm     | GLO Average Printed Wiring Board with Signal Electronics (DfX-compatible) agg Sphera 01.03.2022 Production of signal electronics on base of FR4 substrate<br>GLO Average Printed Wiring Board with Power Electronics (DfX-compatible) agg Sphera 01.03.2022 production of power electronics on base of FR4 substrate                  |
| Smart meter                                   | 0.268 kg       |                                                                                                                                                                                                                                                                                                                                       |
| Polyamide (PA 6)                              | 0.0743 kg      | DE Polyamide 6.6 Granulate (PA 6.6) Mix agg Sphera 01.03.2022 technology mix<br>GLO Plastic injection moulding (parameterized) e-ep Sphera 01.03.2022 injection moulding                                                                                                                                                              |
| Signal electronics                            | 0.00598 sqm    | GLO Average Printed Wiring Board with Signal Electronics (DfX-compatible) agg Sphera 01.03.2022 Production of signal electronics on base of FR4 substrate                                                                                                                                                                             |
| Power electronics                             | 0.00553 sqm    | GLO Average Printed Wiring Board with Power Electronics (DfX-compatible) agg Sphera 01.03.2022 production of power electronics on base of FR4 substrate                                                                                                                                                                               |
| Liquid crystal display                        | 0.0027 sqm     | GLO Liquid Crystal Display (LCD), Panel Assembly LED TFT, mixed TN-IPS technology (mobile phone), in sqm agg Sphera 01.03.2022 TN-IPS technology, without LCD controller, without glass overlay                                                                                                                                       |
| <b>Total weight</b>                           | <b>18.5 kg</b> |                                                                                                                                                                                                                                                                                                                                       |
| <b>Other parts of the system</b>              |                |                                                                                                                                                                                                                                                                                                                                       |
| Gas condensing boiler < 20 kW (0.5 pieces) ** | 66.5 kg        | EU-28 Gas condensing boiler < 20 kW (upright unit) (EN15804 A1-A3) t-agg Sphera 01.03.2022 technology mix                                                                                                                                                                                                                             |
| Underfloor heating system copper (UHS) ***    | 40.9 sqm       | EU-28 Underfloor heating system copper (200 mm distance) (EN15804 A1-A3) agg Sphera 01.03.2022 technology mix                                                                                                                                                                                                                         |
| Underfloor heating system PP (UHS) ****       | 40.9 sqm       | EU-28 Underfloor heating system pp (200 mm distance) (EN15804 A1-A3) agg Sphera 01.03.2022 technology mix                                                                                                                                                                                                                             |
| Underfloor heating system PEX (UHS) ****      | 40.9 sqm       | EU-28 Underfloor heating system pex (200 mm distance) (EN15804 A1-A3) agg Sphera 01.03.2022 technology mix                                                                                                                                                                                                                            |
| Steel Radiator ****                           | 5 pieces       | EU Steel organic coated agg worldsteel 01.07.2022 blast furnace route<br>GLO Steel turning e-ep Sphera 01.03.2022 technology mix<br>EU-28 Electricity grid mix agg Sphera 01.03.2022 AC. technology mix<br>EU-28 Solvent paint white (EN15804 A1-A3) agg Sphera 01.03.2022 technology mix                                             |

\* The scaling factor 0.5 due to the lifetime of the GCB of 20 years (lifetime of PEMFC 10 years)

\*\* The weight according to the scaling factor 0.5 due to the lifetime of the GCB of 20 years (lifetime of PEMFC 10 years)

\*\*\* Basis scenario UHS

\*\*\*\* Sensitivity scenario UHS/Radiators

## Life cycle inventory of the inverter (primary data)

**Table S2.** Life cycle inventory of the SMA Inverter, which was manually dismantled and analyzed for the material composition.

| SMA Inverter |                                                      |                |                                                                                                                               |                                                                                       |
|--------------|------------------------------------------------------|----------------|-------------------------------------------------------------------------------------------------------------------------------|---------------------------------------------------------------------------------------|
|              | Material component                                   | Weight, g      | Material                                                                                                                      |                                                                                       |
| 1            | housing                                              | 2783           | aluminium-silicon                                                                                                             |    |
| 2            | fastening part                                       | 228            | aluminium-silicon                                                                                                             |                                                                                       |
| 3            | core part                                            | 266.2          | steel sheet                                                                                                                   |   |
| 4            | Fan                                                  | 84 (58.8/25.2) | plastics/copper                                                                                                               |                                                                                       |
| 5            | signal electronics<br>(dimension 11 x 16.9 cm)       | 92.6           | printed circuit board (epoxy resins, semiconductor metals and metalloids, other metals)                                       |  |
| 6            | signal-power-electronics<br>(dimension 30 x 31.3 cm) | 1361           | printed circuit board (epoxy resins, semiconductor metals and metalloids, copper, plastics, ferro chrome, lead, other metals) |  |
| 7            | signal-power-electronics<br>(dimension 20 x 31.2 cm) | 963.2          | printed circuit board (epoxy resins, semiconductor metals and metalloids, copper, plastics, ferro chrome, lead, other metals) |  |
| 8            | screws                                               | 281.1          | stainless steel                                                                                                               |                                                                                       |
| 9            | cable with connector                                 | 535.2          | Plastics, copper                                                                                                              |                                                                                       |

|    |                                   |              |                                                     |                                                                                     |
|----|-----------------------------------|--------------|-----------------------------------------------------|-------------------------------------------------------------------------------------|
| 10 | housing. ring core coils.<br>glue | 10406.1      | 9740.5 aluminium-silicon<br>320 coils<br>345.6 glue | 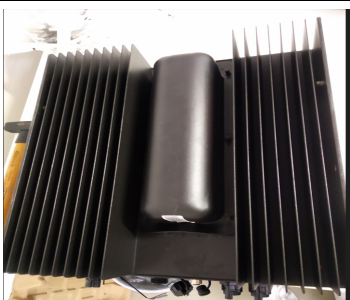 |
|    | <b>total weight</b>               | <b>17000</b> |                                                     |                                                                                     |

**Table S3.** Life cycle inventory of the checkbox Fronius, which was manually dismantled and analyzed for the material composition.

| Checkbox Fronius   |                                                      |               |                                                                                                                               |                                                                                      |
|--------------------|------------------------------------------------------|---------------|-------------------------------------------------------------------------------------------------------------------------------|--------------------------------------------------------------------------------------|
| Material component |                                                      | Weight, g     | Material                                                                                                                      | 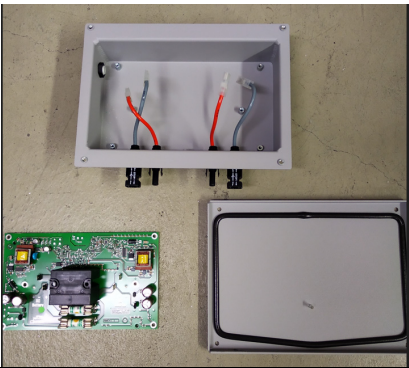 |
| 1                  | signal-power electronics<br>(dimension 20 x 12.2 cm) | 187.6         | printed circuit board (epoxy resins, semiconductor metals and metalloids, copper. Plastics, ferro chrome, lead, other metals) |                                                                                      |
| 2                  | housing                                              | 987.5         | aluminium-silicon                                                                                                             |                                                                                      |
| 3                  | screws                                               | 23.3          | stainless steel                                                                                                               |                                                                                      |
|                    | <b>total weight</b>                                  | <b>1198.4</b> |                                                                                                                               |                                                                                      |

**Table S4.** Life cycle inventory of the smart meter, which was manually dismantled and analyzed for the material composition.

| Smart meter |                                                               |               |                                                                                         | 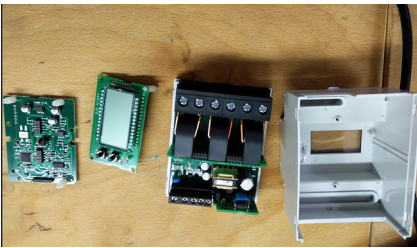 |
|-------------|---------------------------------------------------------------|---------------|-----------------------------------------------------------------------------------------|---------------------------------------------------------------------------------------|
| 1           | housing                                                       | 74.25         | plastic (PA)                                                                            |                                                                                       |
| 2           | power-electronics<br>(dimension 8.5 x 6.5 cm)                 | 161           | printed circuit board (epoxy resins. Copper, plastics, ferro chrome, lead other metals) |                                                                                       |
| 3           | signal-electronics<br>(dimension 6.5 x 4 cm and 6.5 x 5.2 cm) | 33            | printed circuit board (epoxy resins, semiconductor metals and metalloids, other metals) |                                                                                       |
|             | <b>total weight</b>                                           | <b>268.25</b> |                                                                                         |                                                                                       |

**Table S5:** Technical performance of the fuel cell heating unit Vitovvalor PT 2 [1]

| Vitovvalor PT 2       | Type             | F11T          |
|-----------------------|------------------|---------------|
| Nominal heat output   | kW <sub>th</sub> | 0.9 - 11.4    |
| Electrical power      | W <sub>el</sub>  | 750           |
| Thermal performance   | kW <sub>th</sub> | 1.1           |
| Sound power           | dB (A)           | 48            |
| Electrical efficiency | %                | 38 (Hi)       |
| Overall efficiency    | %                | Up to 92 (Hi) |



|                                      |   |               |
|--------------------------------------|---|---------------|
| Standard efficiency Peak load boiler | % | Up to 98 (Hs) |
| Fuel                                 |   | Natural gas   |

**Table S6:** Assumptions for the durability and degradation of the PEMFC based on the reviewed literature [2-5]

| Parameter                                      | Value | Source                                    | Comments                                                                                                                                                                                                                                     |
|------------------------------------------------|-------|-------------------------------------------|----------------------------------------------------------------------------------------------------------------------------------------------------------------------------------------------------------------------------------------------|
| Degradation (minimal), $\mu\text{V/h}$         | 1     | Wu et al._2008                            | According to Wu et al., 2008, normal degradation targets require less than 10% loss in the efficiency of the fuel cell system at the end of life, and a degradation rate of 2–10 $\mu\text{V/h}$ is commonly accepted for most applications. |
| Operating hours, h_scenario 1                  | 83038 | Viesmann; Dodds, P.E., et al_2015 (80000) | Vitovalor PT2 produces electricity for up to 45.5 hours without interruption. The fuel cell then regenerates for 2.5 hours (Viessmann).                                                                                                      |
| Operating hours, h_scenario 2                  | 41519 | S-Y. Ahn_2002; Wu et al._2008 (40000)     | According to Wu et al., 2008, for different applications, the requirements for fuel cell lifetime vary significantly, ranging from 5000 h for cars to 20,000 h for buses and 40,000 h of continuous operation for stationary applications.   |
| Cell voltage, V                                | 0.7   | Wong et al_2015                           | According to Wong et al_2015 Cell voltage is further reduced to 0.7 V, representing a more practical fuel cell operating voltage.                                                                                                            |
| Degradation_scenario 1, %                      | 12%   | calculated                                | According to Dodds, P.E., et al, 2015: the degradation of PEMFC amounts to 1% per year, whereas 1% degradation in electricity production is compensated by 1% increase in heat generation.                                                   |
| Degradation_scenario 2, %                      | 6%    | calculated                                |                                                                                                                                                                                                                                              |
| Scenario 1: th. Energy yield [kWh/a] (83038 h) | 10779 | calculated                                | x1 pieces PEMFC (Lifetime of the considered system - 10 years)                                                                                                                                                                               |
| Scenario 1: el. Energy yield [kWh/a] (83038 h) | 5791  | calculated                                | x1 pieces PEMFC (Lifetime of the considered system - 10 years)                                                                                                                                                                               |
| Scenario 1: gas consumption [kWh/a] (83038 h)  | 18011 | calculated                                | x1 pieces PEMFC (Lifetime of the considered system - 10 years); According to Dodds, P.E., et al, 2015: The efficiency of the PEMFC is 92%.                                                                                                   |
| Scenario 2: th. Energy yield[kWh/a] (41519 h)  | 10208 | calculated                                | x2 pieces PEMFC (Lifetime of the considered system - 10 years)                                                                                                                                                                               |
| Scenario 2: el. Energy yield [kWh/a] (41519 h) | 6180  | calculated                                | x2 pieces PEMFC (Lifetime of the considered system - 10 years)                                                                                                                                                                               |
| Scenario 2: gas consumption [kWh/a] (41519 h)  | 17813 | calculated                                | x2 pieces PEMFC (Lifetime of the considered system - 10 years); According to Dodds, P.E., et al, 2015: The efficiency of the PEMFC is 92%.                                                                                                   |

### C) Parameterized GaBi-model of the manufacturing phase of the energy supply system

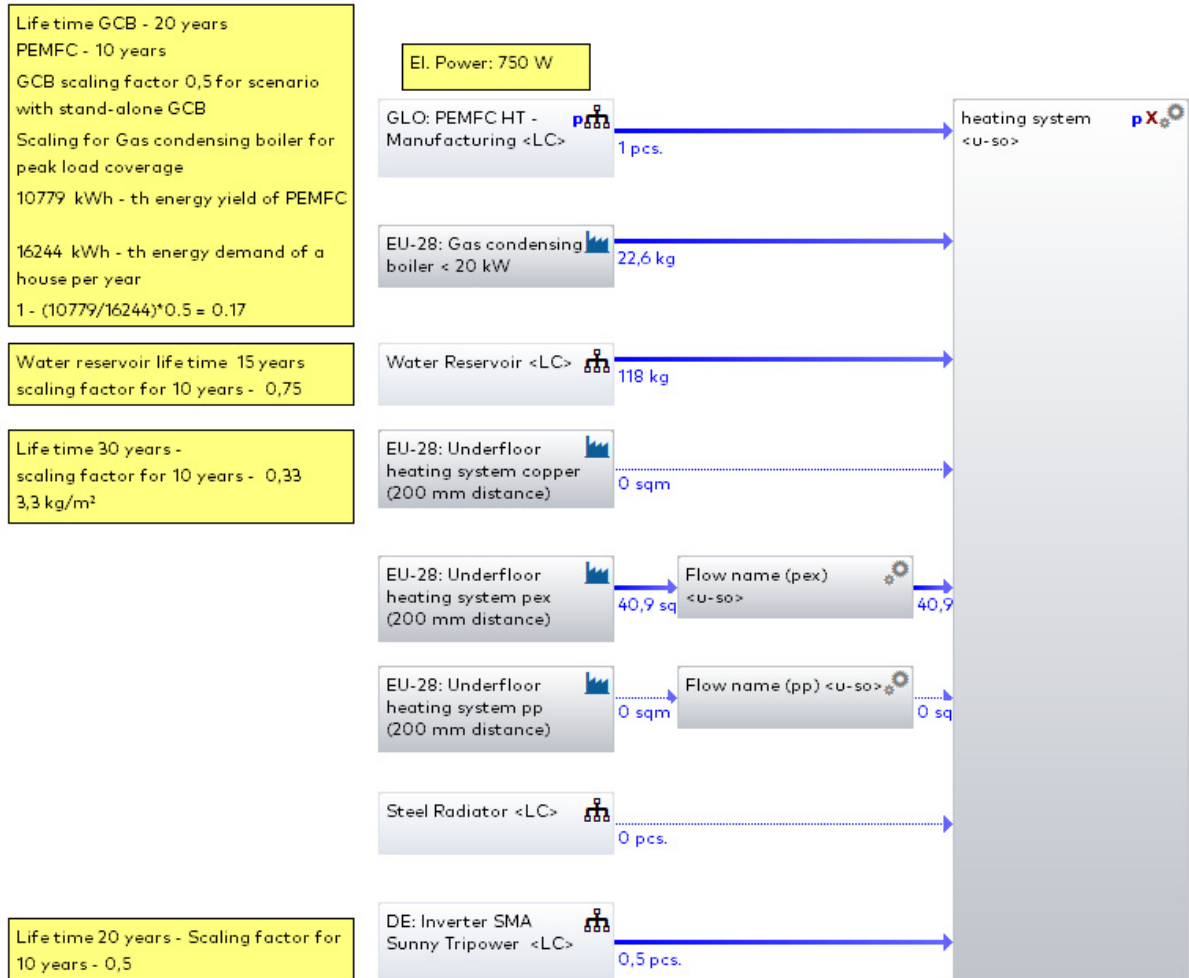

**Figure S2.** Flow chart of the parameterized GaBi-model of the manufacturing phase of the entire energy supply system.

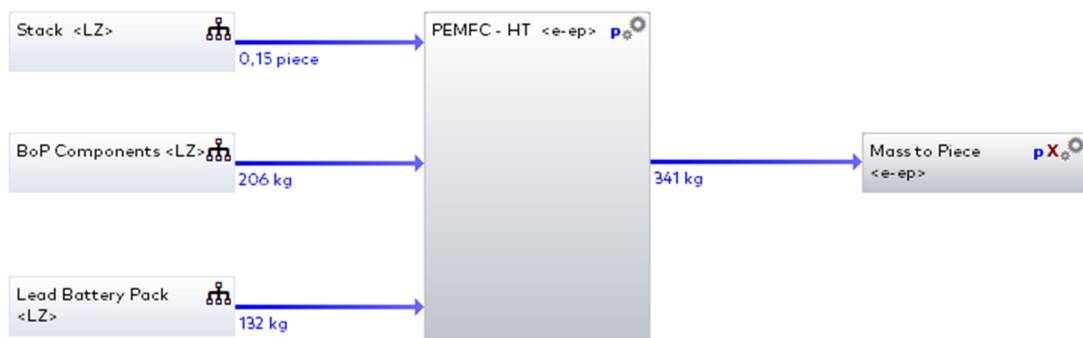

**Figure S3.** Flow chart of the parameterized GaBi-model: manufacturing phase of the PEMFC

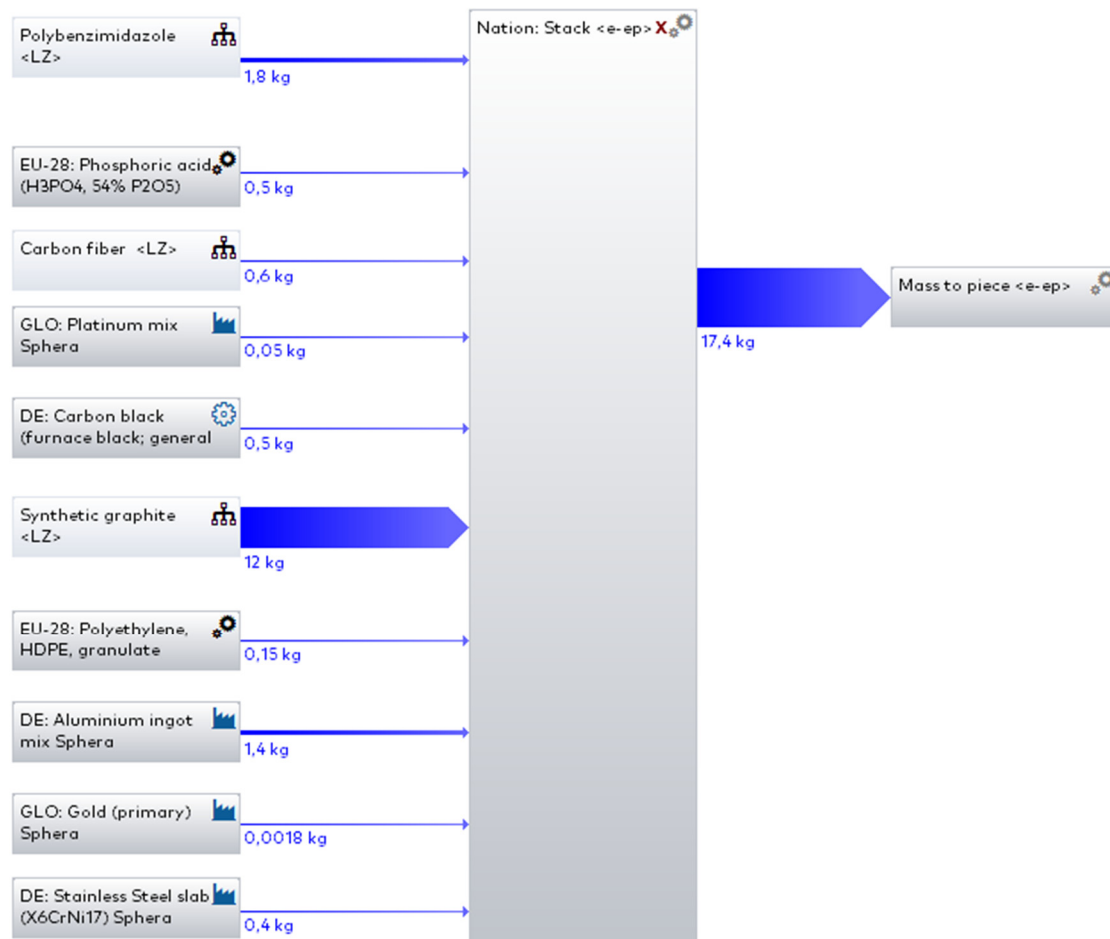

**Figure S4.** Flow chart of the GaBi-model: manufacturing phase of the stack module of the PEMFC

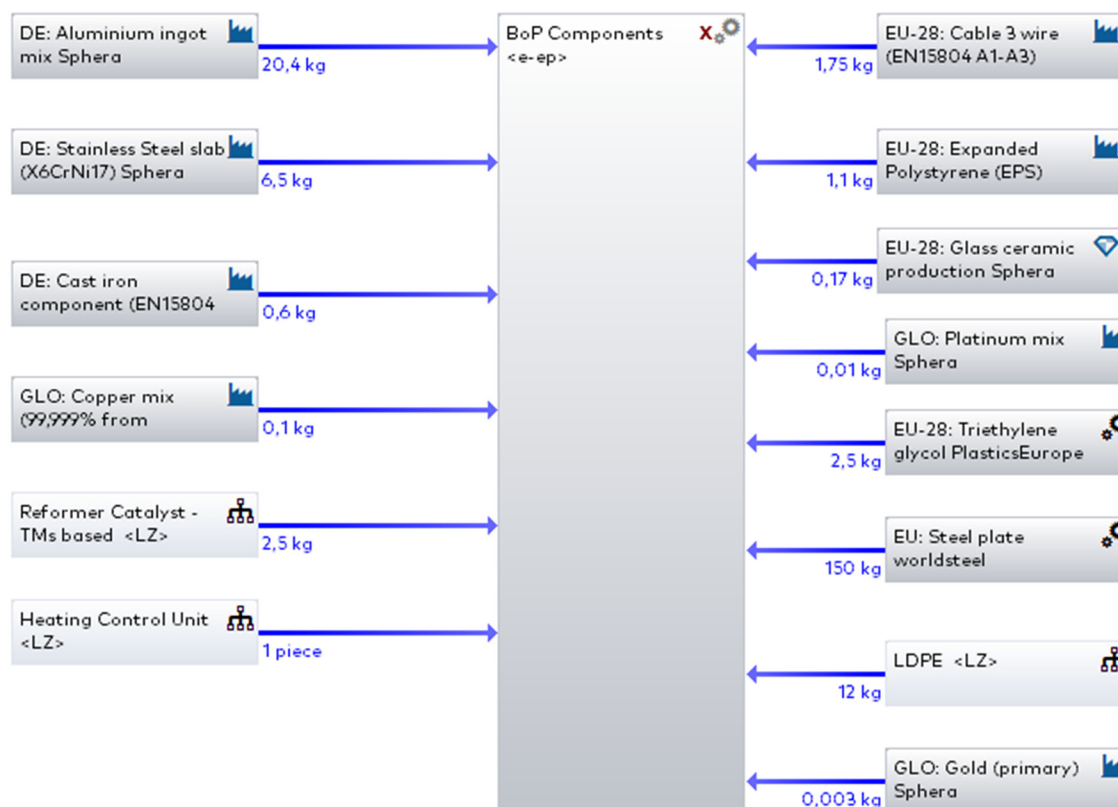

**Figure S5.** Flow chart of the GaBi-model: manufacturing phase of the Balance-of-Plant module of the PEMFC

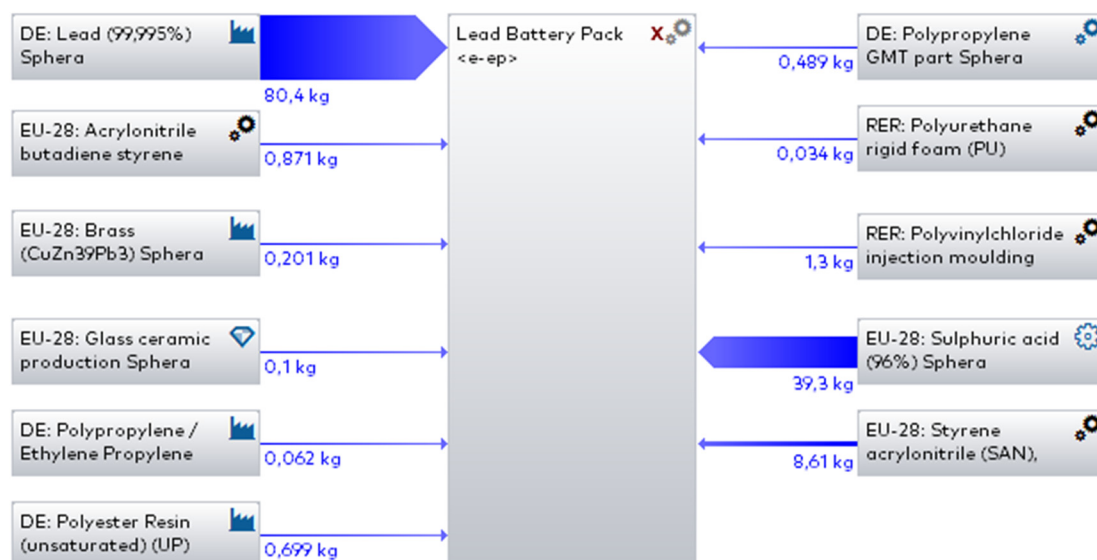

Figure S6. Flow chart of the GaBi-model: manufacturing phase of the lead battery pack module of the PEMFC

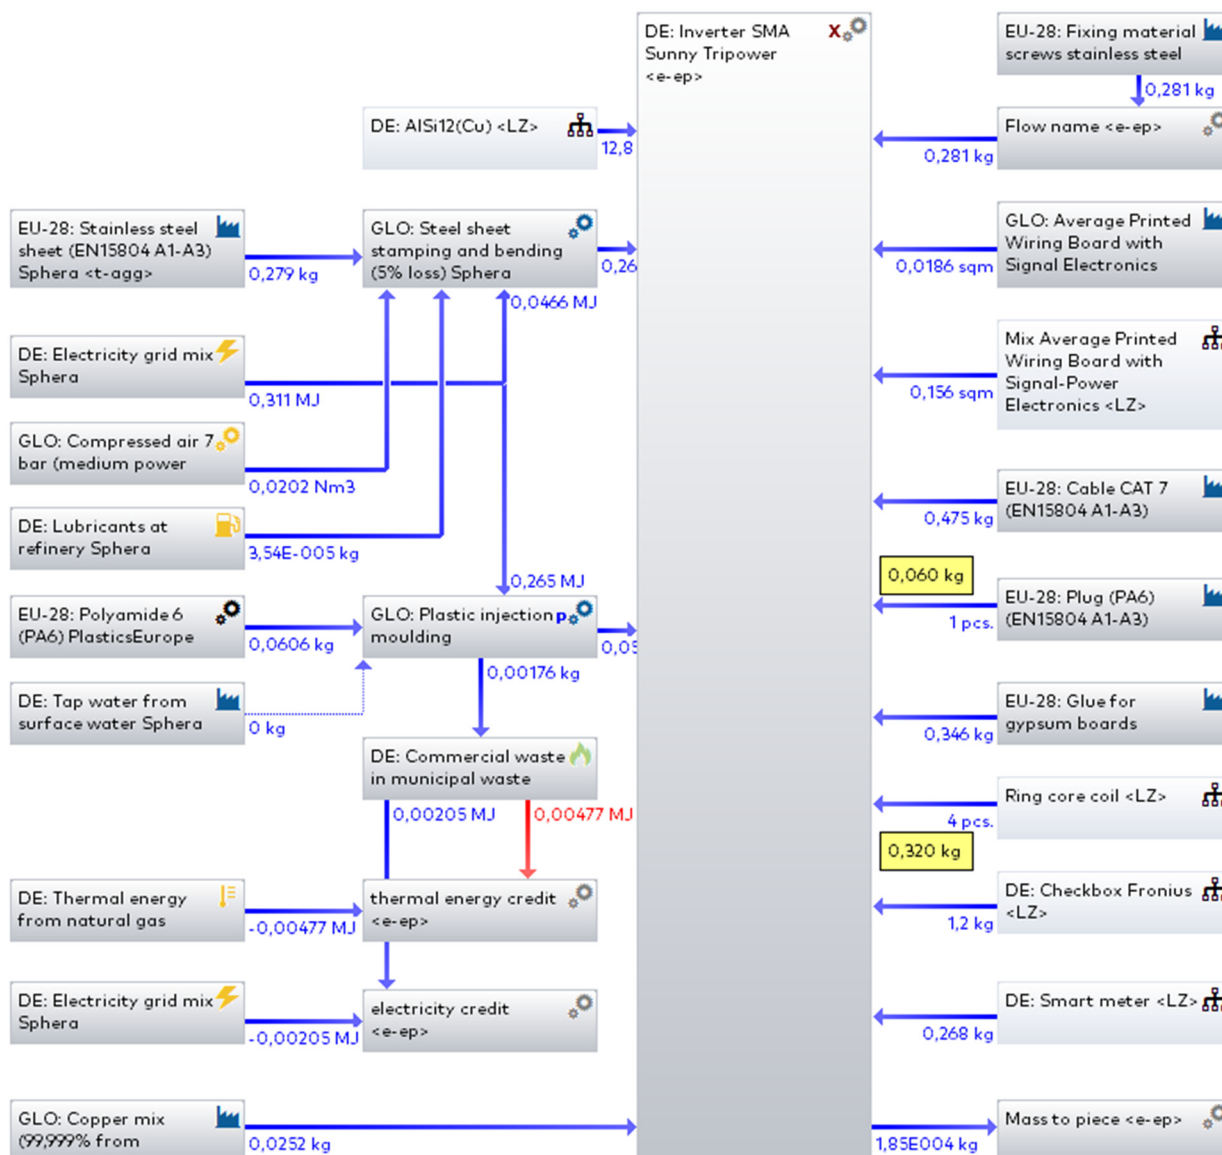

Figure S7. Flow chart of the GaBi-model: manufacturing phase of the SMA Inverter

## D) Parameterized GaBi-model of the use phase of the energy supply system

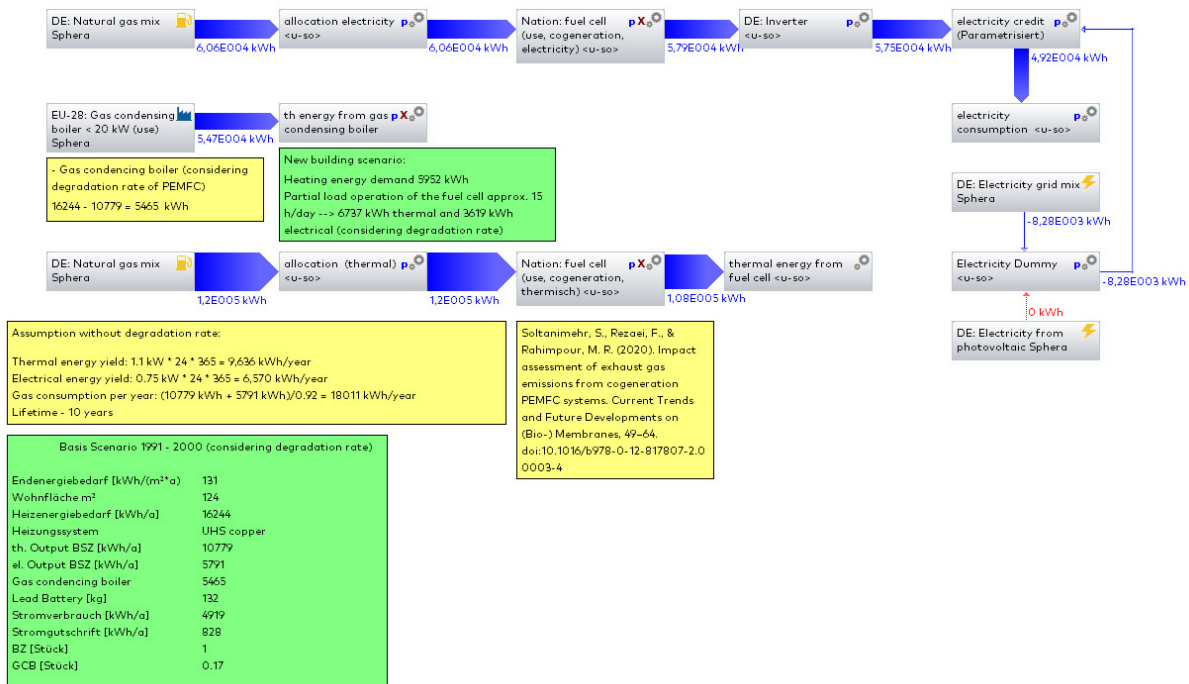

**Figure S8.** Flow chart of the GaBi-model: use phase of the PEMFC system (basis scenario)

**Table S7.** GaBi Parameters for the use phase (basis scenario)

| Parameter       | Formula                                               | Value   | Comments                                                                     |
|-----------------|-------------------------------------------------------|---------|------------------------------------------------------------------------------|
| Allocation_el   | 1-Allocation_th                                       | 0.336   |                                                                              |
| Allocation_th   | BZ_th_out/heating_demand                              | 0.664   |                                                                              |
| BZ_el_out       |                                                       | 5791    | kWh/a electrical energy output from fuel cell                                |
| BZ_th_out       |                                                       | 10779   | kWh/a thermal energy output from fuel cell                                   |
| el_consumption  |                                                       | 4919    | kWh/a electrical energy demand of one single-family hous per year            |
| heating_demand  |                                                       | 16244   | kWh/a thermal energy demand of one single-family hous per year               |
| Inverter_in_out |                                                       | 1       | choice wether Inverter is applicable or not                                  |
| Lifetime        |                                                       | 10      | [a] Lifetime of the system                                                   |
| NG_input        | $(BZ\_el\_out + BZ\_th\_out) / 0.92 \cdot 3.6 / 47.5$ | 1365.03 | kg/a total natural gas consumption by PEMFC                                  |
| NG_input_el     | $NG\_input \cdot Allocation\_el$                      | 459.24  | kg consumption of the natural gas for electricity production in the PEMFC    |
| NG_input_th     | $NG\_input \cdot Allocation\_th$                      | 905.79  | kg consumption of the natural gas for thermal energy production in the PEMFC |

## E) Parameterized GaBi-model of the EoL phase of the energy supply system

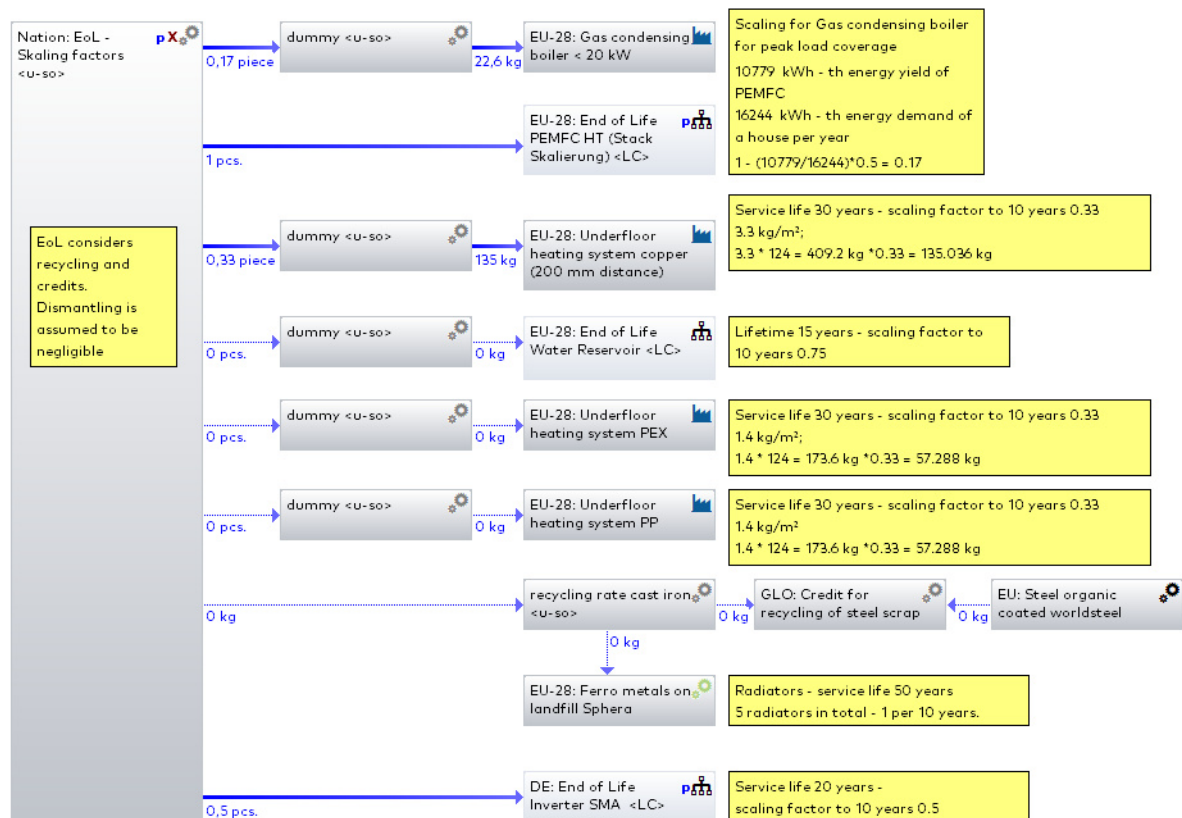

Figure S9. Flow chart of the GaBi-model - EoL phase of the entire energy supply system

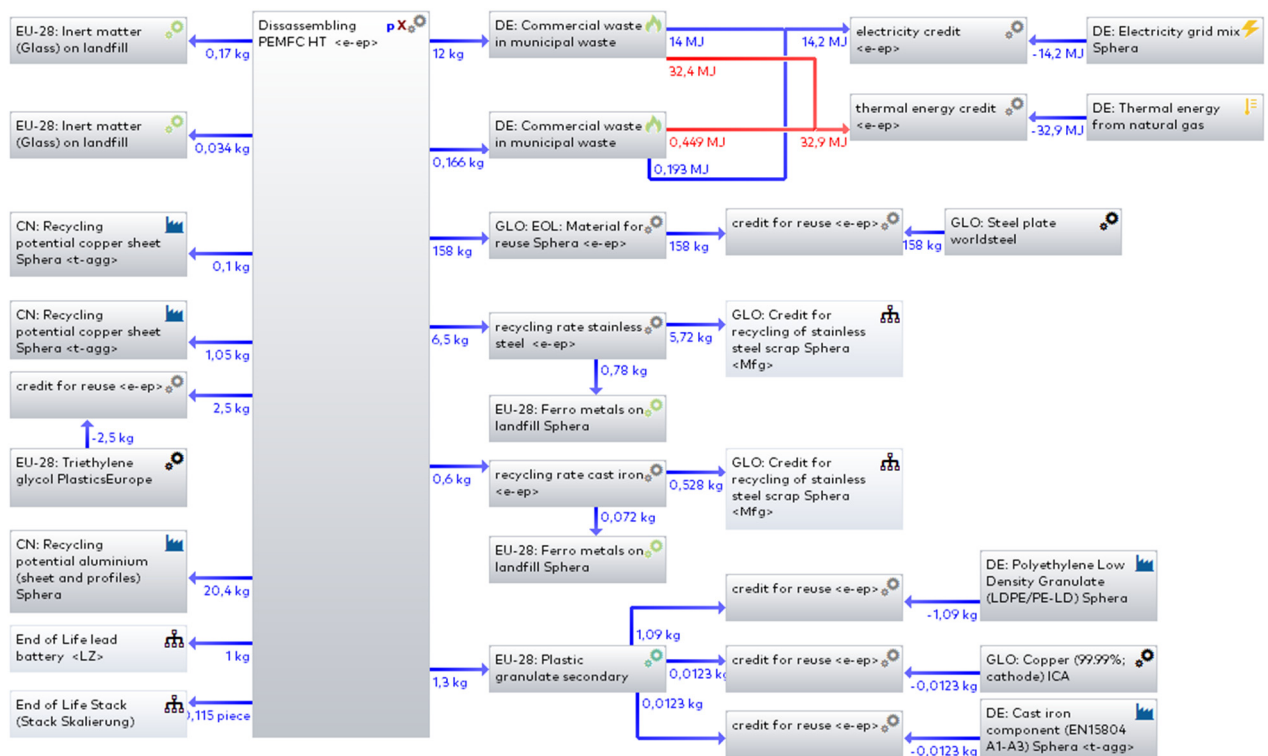

Figure S10. Flow chart of the GaBi-model - EoL phase: disassembling of the PEMFC



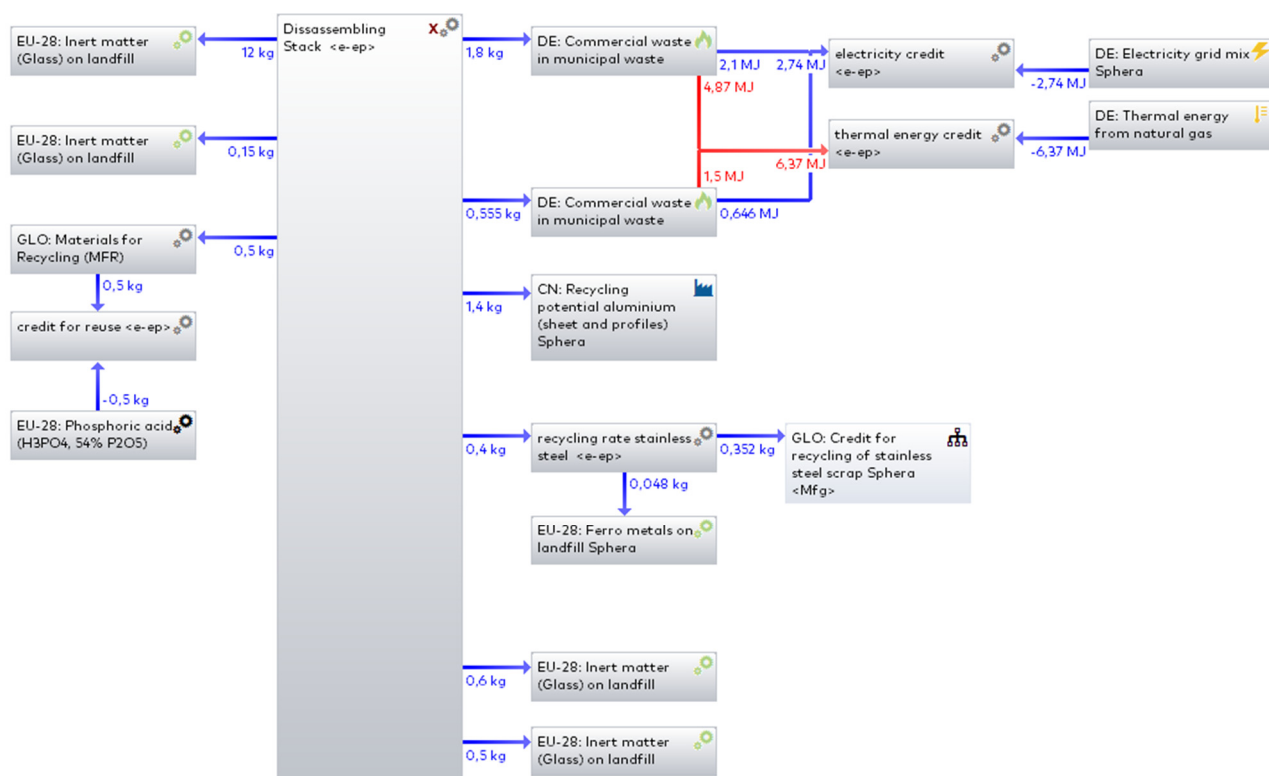

**Figure S11.** Flow chart of the GaBi-model - EoL phase: disassembling of the Stack

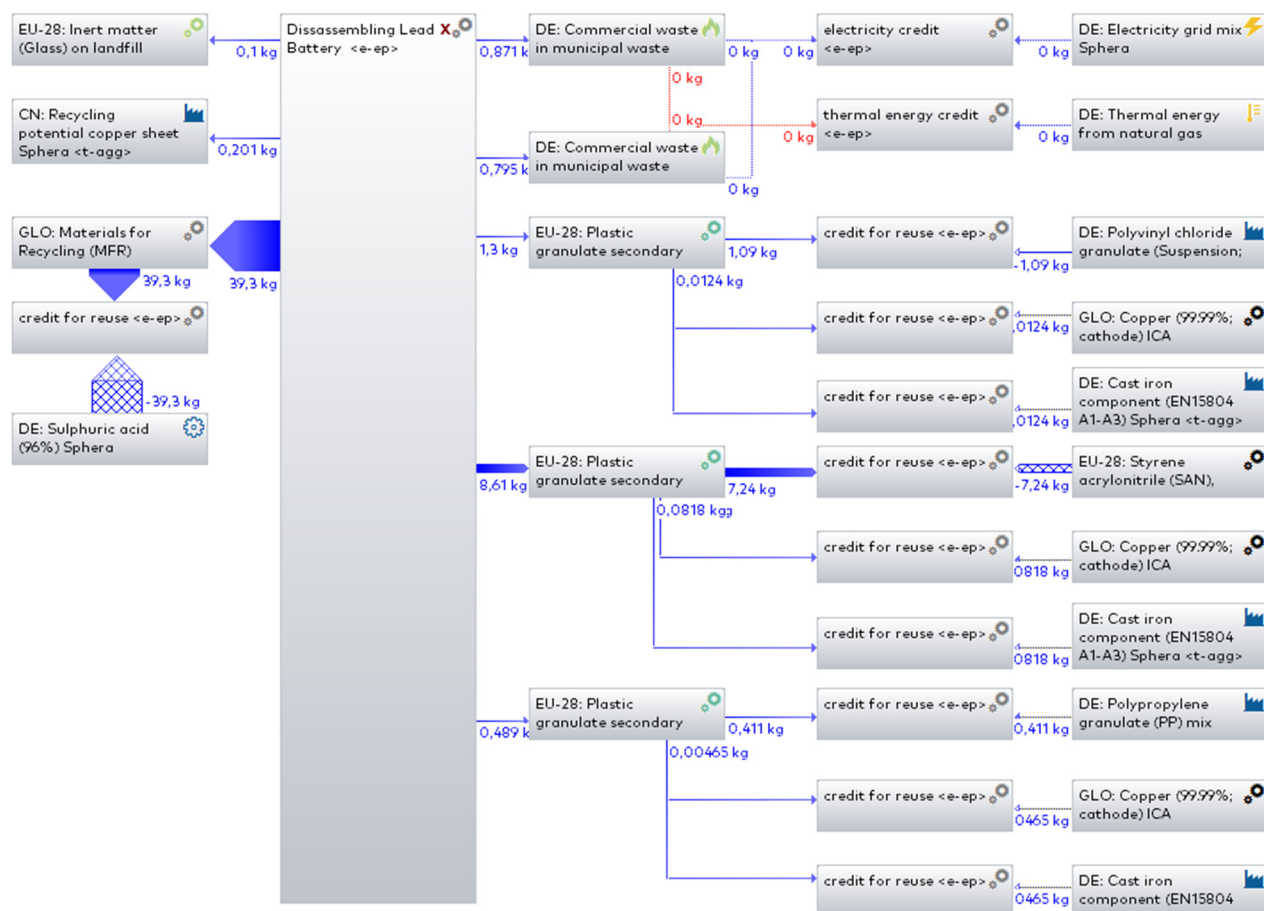

**Figure S12.** Flow chart of the GaBi-model - EoL phase: disassembling of the Lead Battery

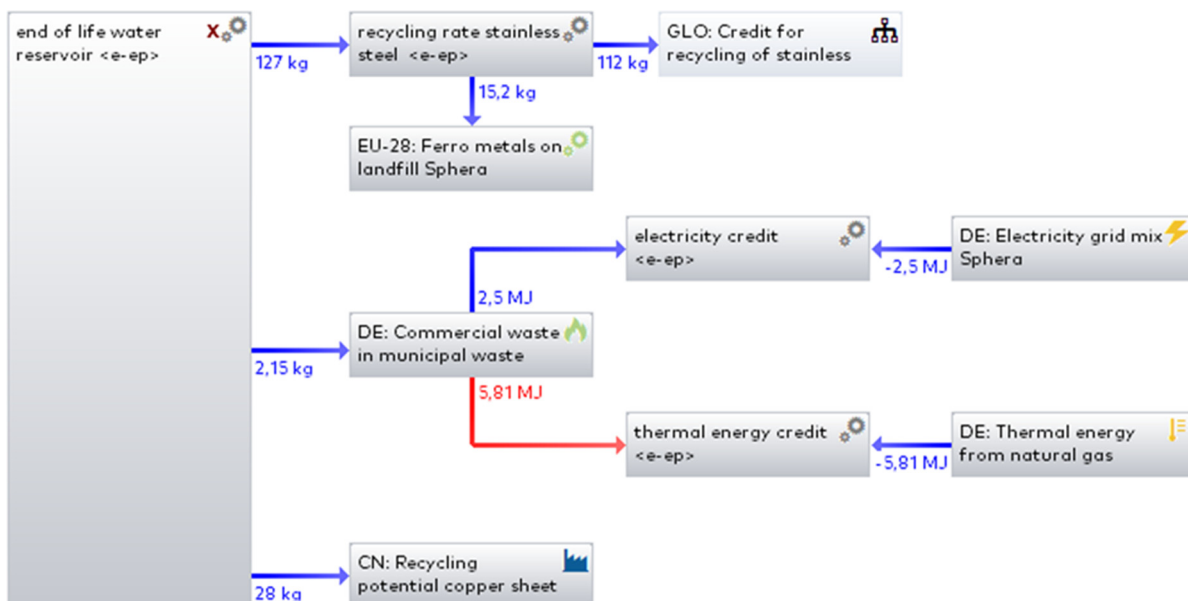

**Figure S13.** Flow chart of the GaBi-model - EoL phase: water reservoir

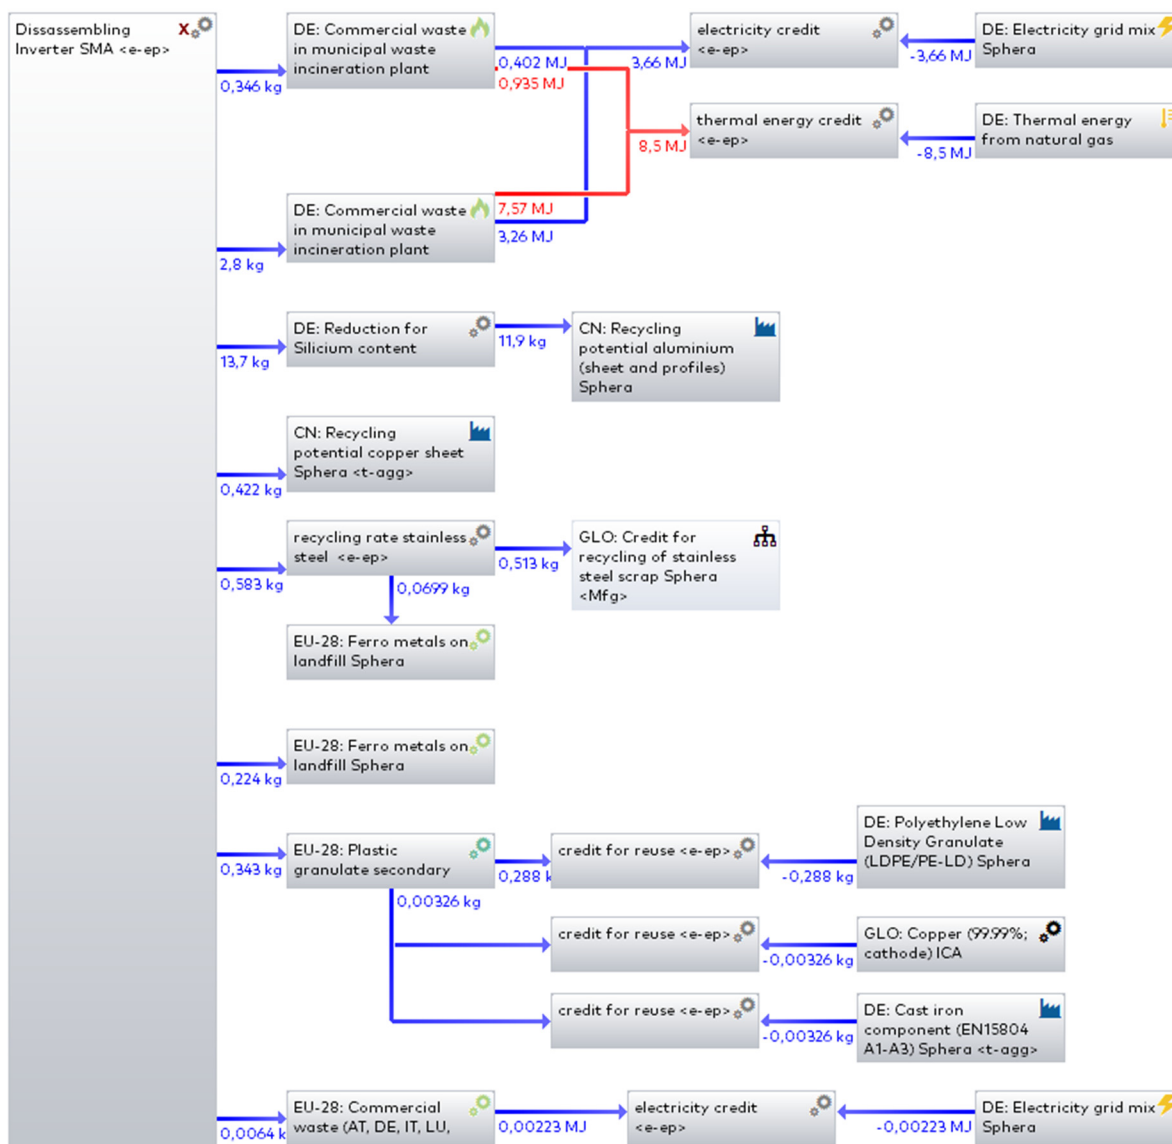

**Figure S14.** Flow chart of the GaBi-model - EoL phase: SMA Inverter



**F) Key parameters for the description of the energy supply system of a single-family house in Germany**

**Table S8.** Description of energy supply system of a single-family house (basis scenario). [2-4, 6-8]

| Parameter                                         | Value  |
|---------------------------------------------------|--------|
| end energy demand [kWh/(m <sup>2</sup> *a)]       | 131    |
| living space m <sup>2</sup>                       | 124    |
| heating energy demand [kWh/a]                     | 16244  |
| electricity consumption [kWh/a]                   | 4919   |
| PEMFC* operation [h/a]                            | 8303.8 |
| thermal energy yield from PEMFC [kWh/a]           | 10779  |
| electrical energy yield from PEMFC [kWh/a]        | 5791   |
| gas consumption by PEMFC [kWh/a]                  | 18011  |
| thermal energy from Gas condensing boiler [kWh/a] | 5465   |

\* Proton exchange membrane fuel cell.

**G) Assumptions for the use phase basis scenario and sensitivity scenarios (old and new building types)**

**Table S9.** Sensitivity analysis (building type): key figures for the use phase basis scenario and sensitivity scenarios (old and new building types) [7]

| Parameters                                  | Basis Scenario<br>1991 - 2000 | Old Building<br>(unrefurbished)<br>1949 - 1978 | New Building<br>from 2009* |
|---------------------------------------------|-------------------------------|------------------------------------------------|----------------------------|
| End energy demand [kWh/(m <sup>2</sup> *a)] | 131                           | 236                                            | 48                         |
| Heating energy demand [kWh/a]               | 124                           | 124                                            | 124                        |
| Heating system                              | 16244                         | 29264                                          | 5952                       |
| Thermal energy yield PEMFC [kWh/a]          | UHS copper                    | UHS copper                                     | UHS copper                 |
| Electrical energy yield PEMFC [kWh/a]       | 10779                         | 10779                                          | 6737                       |
| Fuel cell operation [h/a]                   | 5791                          | 5791                                           | 3619                       |
| Gas consumption (GCB) [kWh/a]               | 5465                          | 18485                                          | -785                       |
| Electricity consumption (household) [kWh/a] | 4919                          | 4919                                           | 4919                       |
| Electricity credit * [kWh/a]                | 828                           | 828                                            | -1327                      |
| FC [pieces]                                 | 1                             | 1                                              | 0.66                       |
| GCB [pieces]                                | 0.17                          | 0.32                                           | 0                          |
| Lifetime of the system [years]              | 10                            | 10                                             | 10                         |

\*Surplus fed into grid/shortage covered from grid

**Table S10.** Sensitivity analysis (PEMFC durability): Key figures for the life cycle model for the PEMFC-based energy supply system for a single-family house: basis scenario (83038 operating hours) and sensitivity scenario (41519 operating hours) [7]

|                                             | Basis Scenario 1991 - 2000<br>(83038 h) | Basis Scenario 1991 - 2000<br>(41519 h) |
|---------------------------------------------|-----------------------------------------|-----------------------------------------|
| End energy demand [kWh/(m <sup>2</sup> *a)] | 131                                     | 236                                     |
| Heating energy demand [kWh/a]               | 124                                     | 124                                     |
| Heating system                              | 16244                                   | 16244                                   |
| Thermal energy yield PEMFC [kWh/a]          | UHS copper                              | UHS copper                              |
| Electrical energy yield PEMFC [kWh/a]       | 10779                                   | 10208                                   |
| Fuel cell operation [h/a]                   | 5791                                    | 6180                                    |
| Gas consumption (GCB) [kWh/a]               | 5465                                    | 6036                                    |

|                                             |      |      |
|---------------------------------------------|------|------|
| Electricity consumption (household) [kWh/a] | 4919 | 4919 |
| Electricity credit * [kWh/a]                | 828  | 1261 |
| FC [pieces]                                 | 1    | 2    |
| GCB [pieces]                                | 0.17 | 0.19 |
| Lifetime of the system [years]              | 10   | 10   |

\*Surplus fed into grid/shortage covered from grid

## H) Life cycle assessment (LCA) results

**Table S11.** Absolute values for the results from comparative LCA of the energy supply system for a single-family house. Gas condensing boiler and electricity from grid mix was used as reference scenario and compared to the alternative system with a proton exchange membrane fuel cell (PEMFC).

| Gas condensing boiler (GCB) & electricity from grid mix |                     |           |                   |          |                                              |
|---------------------------------------------------------|---------------------|-----------|-------------------|----------|----------------------------------------------|
| Impact category <sup>1</sup>                            | Manufacturing phase | Use phase | End-of-life phase | Total    | Environmental performance (100% = reference) |
| GWP [kg CO2 eq.]                                        | 1.24E+03            | 6.46E+04  | -2.33E+02         | 6.56E+04 | 100%                                         |
| AP [kg SO2 eq.]                                         | 1.11E+01            | 4.44E+01  | -2.15E+00         | 5.34E+01 | 100%                                         |
| EP [kg Phosphate eq.]                                   | 1.03E+00            | 8.05E+00  | -7.03E-02         | 9.01E+00 | 100%                                         |
| ODP [kg R11 eq.]                                        | 1.58E-08            | 6.63E-07  | -7.63E-10         | 6.78E-07 | 100%                                         |
| POCP [kg Ethene eq.]                                    | 1.15E+00            | 4.18E+00  | -1.12E-01         | 5.22E+00 | 100%                                         |
| ADP fossil [MJ]                                         | 1.61E+04            | 8.91E+05  | -2.40E+03         | 9.05E+05 | 100%                                         |
| ADP elements [kg Sb eq.]                                | 3.92E-01            | 1.46E-02  | -9.28E-02         | 3.14E-01 | 100%                                         |
| FAETP [kg DCB eq.]                                      | 3.62E+01            | 5.10E+01  | -4.69E+00         | 8.25E+01 | 100%                                         |
| HTP [kg DCB eq.]                                        | 1.04E+04            | 1.29E+03  | -4.49E+02         | 1.12E+04 | 100%                                         |
| MAETP [kg DCB eq.]                                      | 5.31E+05            | 3.13E+06  | -1.26E+05         | 3.54E+06 | 100%                                         |
| TETP [kg DCB eq.]                                       | 1.04E+01            | 7.15E+01  | -1.48E+00         | 8.04E+01 | 100%                                         |
| PED net cal. value [MJ]                                 | 2.18E+04            | 1.33E+06  | -3.33E+03         | 1.35E+06 | 100%                                         |
| PEMFC mini-CHP                                          |                     |           |                   |          |                                              |
| Impact category <sup>1</sup>                            | Manufacturing phase | Use phase | End-of-life phase | Total    | Environmental performance (100% = reference) |
| GWP [kg CO2 eq.]                                        | 2.92E+03            | 1.41E+04  | -1.51E+03         | 1.55E+04 | 39%                                          |
| AP [kg SO2 eq.]                                         | 3.07E+01            | 5.47E+00  | -1.62E+01         | 2.00E+01 | 232%                                         |
| EP [kg Phosphate eq.]                                   | 1.72E+00            | 9.98E-01  | -5.57E-01         | 2.16E+00 | 83%                                          |
| ODP [kg R11 eq.]                                        | 3.10E-07            | -9.59E-08 | -2.33E-09         | 2.12E-07 | 367%                                         |
| POCP [kg Ethene eq.]                                    | 2.17E+00            | 1.61E+00  | -9.53E-01         | 2.83E+00 | 134%                                         |
| ADP fossil [MJ]                                         | 3.66E+04            | 8.57E+05  | -1.70E+04         | 8.77E+05 | 109%                                         |
| ADP elements [kg Sb eq.]                                | 8.15E-01            | 1.17E-03  | -1.36E-01         | 6.80E-01 | 291%                                         |
| FAETP [kg DCB eq.]                                      | 7.77E+01            | 8.96E+00  | -1.36E+01         | 7.31E+01 | 681%                                         |
| HTP [kg DCB eq.]                                        | 1.11E+04            | 5.12E+02  | -7.83E+02         | 1.08E+04 | 110%                                         |
| MAETP [kg DCB eq.]                                      | 1.13E+06            | -5.61E+04 | -7.23E+05         | 3.51E+05 | 37%                                          |
| TETP [kg DCB eq.]                                       | 2.16E+01            | 6.71E+01  | -6.27E+00         | 8.24E+01 | 168%                                         |
| PED net cal. value [MJ]                                 | 4.87E+04            | 9.09E+05  | -1.99E+04         | 9.38E+05 | 78%                                          |

<sup>1</sup> Global Warming Potential (GWP 100 years) [kg CO2 eq.]; Acidification Potential (AP) [kg SO2 eq.]; Eutrophication Potential (EP) [kg Phosphate eq.]; Ozone Layer Depletion Potential (ODP, steady state) [kg R11 eq.]; Photochem. Ozone Creation Potential (POCP) [kg Ethene eq.]; Abiotic Depletion (ADP fossil) [MJ]; Abiotic Depletion (ADP elements) [kg Sb eq.]; Freshwater Aquatic Ecotoxicity Pot. (FAETP inf.) [kg DCB eq.]; Human Toxicity Potential

(HTP inf.) [kg DCB eq.]; Marine Aquatic Ecotoxicity Pot. (MAETP inf.) [kg DCB eq.]; Terrestrial Ecotoxicity Potential (TETP inf.) [kg DCB eq.]; Primary energy demand from ren. and non ren. resources (net cal. value) (PED) [MJ]

**Table S12.** Absolute values for the LCA results for the manufacturing phase of the PEMFC energy supply system for a single-family house in Germany.

| Impact category <sup>1</sup> | PEMFC<br>(0.75 kW) | Inverter | Water<br>Reservoir | Gas condensing<br>boiler < 20 kW | UHS copper<br>(200 mm<br>distance) | Total    |
|------------------------------|--------------------|----------|--------------------|----------------------------------|------------------------------------|----------|
| GWP [kg CO2 eq.]             | 1.50E+03           | 3.86E+02 | 4.31E+02           | 1.06E+02                         | 4.99E+02                           | 2.92E+03 |
| AP [kg SO2 eq.]              | 1.90E+01           | 1.72E+00 | 3.43E+00           | 5.86E-01                         | 5.94E+00                           | 3.07E+01 |
| EP [kg Phosphate eq.]        | 6.29E-01           | 1.30E-01 | 2.36E-01           | 3.52E-02                         | 6.90E-01                           | 1.72E+00 |
| ODP [kg R11 eq.]             | 2.56E-07           | 4.61E-08 | 1.69E-09           | 4.10E-09                         | 2.02E-09                           | 3.10E-07 |
| POCP [kg Ethene eq.]         | 9.72E-01           | 1.27E-01 | 1.90E-01           | 3.80E-02                         | 8.45E-01                           | 2.17E+00 |
| ADP fossil [MJ]              | 1.85E+04           | 4.44E+03 | 5.15E+03           | 1.26E+03                         | 7.28E+03                           | 3.66E+04 |
| ADP elements [kg Sb eq.]     | 4.12E-01           | 3.26E-02 | 7.23E-02           | 1.10E-02                         | 2.87E-01                           | 8.15E-01 |
| FAETP [kg DCB eq.]           | 3.88E+01           | 4.65E+00 | 2.08E+01           | 1.03E+00                         | 1.24E+01                           | 7.77E+01 |
| HTP [kg DCB eq.]             | 1.02E+03           | 3.52E+02 | 8.71E+03           | 3.67E+02                         | 6.23E+02                           | 1.11E+04 |
| MAETP [kg DCB eq.]           | 4.71E+05           | 1.85E+05 | 1.84E+05           | 3.07E+04                         | 2.56E+05                           | 1.13E+06 |
| TETP [kg DCB eq.]            | 3.80E+00           | 8.08E+00 | 4.03E+00           | 3.66E-01                         | 5.34E+00                           | 2.16E+01 |
| PED net cal. value [MJ]      | 2.25E+04           | 6.42E+03 | 6.78E+03           | 1.63E+03                         | 8.98E+03                           | 4.63E+04 |

<sup>1</sup> Global Warming Potential (GWP 100 years) [kg CO2 eq.]; Acidification Potential (AP) [kg SO2 eq.]; Eutrophication Potential (EP) [kg Phosphate eq.]; Ozone Layer Depletion Potential (ODP, steady state) [kg R11 eq.]; Photochem. Ozone Creation Potential (POCP) [kg Ethene eq.]; Abiotic Depletion (ADP fossil) [MJ]; Abiotic Depletion (ADP elements) [kg Sb eq.]; Freshwater Aquatic Ecotoxicity Pot. (FAETP inf.) [kg DCB eq.]; Human Toxicity Potential (HTP inf.) [kg DCB eq.]; Marine Aquatic Ecotoxicity Pot. (MAETP inf.) [kg DCB eq.]; Terrestrial Ecotoxicity Potential (TETP inf.) [kg DCB eq.]; Primary energy demand from ren. and non ren. resources (net cal. value) (PED) [MJ]

**Table S13.** Absolute values for the comparative life cycle assessment results for the use phase of the energy supply system for a single-family house in the German climatic conditions: gas condensing boiler and electricity from grid mix vs. the PEM fuel cell.

| Gas condensing boiler (GCB) & electricity from grid mix |                              |                              |                          |           |          |                                                       |
|---------------------------------------------------------|------------------------------|------------------------------|--------------------------|-----------|----------|-------------------------------------------------------|
| Impact category <sup>1</sup>                            | Electricity<br>from grid mix | Natural gas<br>for fuel cell | Gas condensing<br>boiler | PEMFC     | Total    | Environmental<br>performance<br>(100% =<br>reference) |
| GWP [kg CO2 eq.]                                        | 2.49E+04                     | 3.97E+04                     | -                        | -         | 6.46E+04 | 100%                                                  |
| AP [kg SO2 eq.]                                         | 3.20E+01                     | 1.24E+01                     | -                        | -         | 4.44E+01 | 100%                                                  |
| EP [kg Phosphate eq.]                                   | 6.02E+00                     | 2.03E+00                     | -                        | -         | 8.05E+00 | 100%                                                  |
| ODP [kg R11 eq.]                                        | 6.38E-07                     | 2.50E-08                     | -                        | -         | 6.63E-07 | 100%                                                  |
| POCP [kg Ethene eq.]                                    | 2.22E+00                     | 1.96E+00                     | -                        | -         | 4.18E+00 | 100%                                                  |
| ADP fossil [MJ]                                         | 2.45E+05                     | 6.46E+05                     | -                        | -         | 8.91E+05 | 100%                                                  |
| ADP elements [kg Sb eq.]                                | 1.23E-02                     | 2.37E-03                     | -                        | -         | 1.47E-02 | 100%                                                  |
| FAETP [kg DCB eq.]                                      | 3.84E+01                     | 1.26E+01                     | -                        | -         | 5.10E+01 | 100%                                                  |
| HTP [kg DCB eq.]                                        | 8.36E+02                     | 4.51E+02                     | -                        | -         | 1.29E+03 | 100%                                                  |
| MAETP [kg DCB eq.]                                      | 2.73E+06                     | 3.96E+05                     | -                        | -         | 3.13E+06 | 100%                                                  |
| TETP [kg DCB eq.]                                       | 2.81E+01                     | 4.35E+01                     | -                        | -         | 7.16E+01 | 100%                                                  |
| PED net cal. value [MJ]                                 | 5.66E+05                     | 6.72E+05                     | -                        | -         | 1.24E+06 | 100%                                                  |
| PEMFC mini-CHP                                          |                              |                              |                          |           |          |                                                       |
| Impact category <sup>1</sup>                            | Electricity<br>credit        | Natural Gas<br>for Fuel cell | Gas condensing<br>boiler | Fuel cell | Total    | Environmental<br>performance<br>(100% =<br>reference) |

|                          |           |          |          |          |           |      |
|--------------------------|-----------|----------|----------|----------|-----------|------|
| GWP [kg CO2 eq.]         | -4.19E+03 | 4.94E+03 | 1.34E+04 |          | 1.42E+04  | 22%  |
| AP [kg SO2 eq.]          | -5.39E+00 | 6.68E+00 | 4.18E+00 | 5.62E-05 | 5.47E+00  | 12%  |
| EP [kg Phosphate eq.]    | -1.01E+00 | 1.33E+00 | 6.83E-01 | 1.46E-05 | 1.00E+00  | 12%  |
| ODP [kg R11 eq.]         | -1.07E-07 | 3.01E-09 | 8.41E-09 |          | -9.56E-08 | -14% |
| POCP [kg Ethene eq.]     | -3.74E-01 | 1.32E+00 | 6.59E-01 | 1.07E-05 | 1.61E+00  | 38%  |
| ADP fossil [MJ]          | -4.13E+04 | 6.81E+05 | 2.17E+05 |          | 8.57E+05  | 96%  |
| ADP elements [kg Sb eq.] | -2.07E-03 | 2.44E-03 | 7.99E-04 |          | 1.17E-03  | 8%   |
| FAETP [kg DCB eq.]       | -6.46E+00 | 1.12E+01 | 4.25E+00 |          | 8.96E+00  | 18%  |
| HTP [kg DCB eq.]         | -1.41E+02 | 5.01E+02 | 1.52E+02 | 1.35E-04 | 5.12E+02  | 40%  |
| MAETP [kg DCB eq.]       | -4.60E+05 | 2.71E+05 | 1.33E+05 |          | -5.60E+04 | -2%  |
| TETP [kg DCB eq.]        | -4.73E+00 | 5.72E+01 | 1.46E+01 |          | 6.71E+01  | 94%  |
| PED net cal. value [MJ]  | -9.53E+04 | 7.59E+05 | 2.26E+05 |          | 8.90E+05  | 72%  |

<sup>1</sup> Global Warming Potential (GWP 100 years) [kg CO2 eq.]; Acidification Potential (AP) [kg SO2 eq.]; Eutrophication Potential (EP) [kg Phosphate eq.]; Ozone Layer Depletion Potential (ODP, steady state) [kg R11 eq.]; Photochem. Ozone Creation Potential (POCP) [kg Ethene eq.]; Abiotic Depletion (ADP fossil) [MJ]; Abiotic Depletion (ADP elements) [kg Sb eq.]; Freshwater Aquatic Ecotoxicity Pot. (FAETP inf.) [kg DCB eq.]; Human Toxicity Potential (HTP inf.) [kg DCB eq.]; Marine Aquatic Ecotoxicity Pot. (MAETP inf.) [kg DCB eq.]; Terrestrial Ecotoxicity Potential (TETP inf.) [kg DCB eq.]; Primary energy demand from ren. and non ren. resources (net cal. value) (PED) [MJ]

#### I) Life cycle assessment (LCA) results - sensitivity scenarios

**Table S14.** Absolute values for the sensitivity scenario LCA of the PEM fuel cell energy supply system: comparison of basis scenario building type from 1991 – 2000 with the old building type from 1949 – 1978 and new building type from 2009

| Impact category <sup>1</sup> | Basis scenario<br>1991 - 2000 | Old building<br>1949-1978 | New building<br>- from 2009 |
|------------------------------|-------------------------------|---------------------------|-----------------------------|
| GWP [kg CO2 eq.]             | 2.74E+03                      | 5.92E+03                  | 1.98E+03                    |
| AP [kg SO2 eq.]              | 2.24E+01                      | 2.34E+01                  | 2.19E+01                    |
| EP [kg Phosphate eq.]        | 1.31E+00                      | 1.48E+00                  | 1.40E+00                    |
| ODP [kg R11 eq.]             | 2.97E-07                      | 2.99E-07                  | 3.17E-07                    |
| POCP [kg Ethene eq.]         | 1.68E+00                      | 1.83E+00                  | 1.58E+00                    |
| ADP fossil [MJ]              | 1.06E+05                      | 1.57E+05                  | 6.35E+04                    |
| ADP elements [kg Sb eq.]     | 6.67E-01                      | 6.67E-01                  | 6.39E-01                    |
| FAETP [kg DCB eq.]           | 3.68E+01                      | 3.78E+01                  | 3.60E+01                    |
| HTP [kg DCB eq.]             | 1.00E+04                      | 1.00E+04                  | 9.21E+03                    |
| MAETP [kg DCB eq.]           | 1.62E+05                      | 1.94E+05                  | 2.32E+05                    |
| TETP [kg DCB eq.]            | 1.71E+01                      | 2.06E+01                  | 1.40E+01                    |
| PED net cal. value [MJ]      | 1.04E+05                      | 1.58E+05                  | 7.62E+04                    |

<sup>1</sup> Global Warming Potential (GWP 100 years) [kg CO2 eq.]; Acidification Potential (AP) [kg SO2 eq.]; Eutrophication Potential (EP) [kg Phosphate eq.]; Ozone Layer Depletion Potential (ODP, steady state) [kg R11 eq.]; Photochem. Ozone Creation Potential (POCP) [kg Ethene eq.]; Abiotic Depletion (ADP fossil) [MJ]; Abiotic Depletion (ADP elements) [kg Sb eq.]; Freshwater Aquatic Ecotoxicity Pot. (FAETP inf.) [kg DCB eq.]; Human Toxicity Potential (HTP inf.) [kg DCB eq.]; Marine Aquatic Ecotoxicity Pot. (MAETP inf.) [kg DCB eq.]; Terrestrial Ecotoxicity Potential (TETP inf.) [kg DCB eq.]; Primary energy demand from ren. and non ren. resources (net cal. value) (PED) [MJ]

**Table S15.** Absolute values for the sensitivity scenario LCA of the PEM fuel cell energy supply system: comparison of basis scenario 83038 h (durability of the PEMFC 10 years) and the 41519 h (durability of the PEMFC 5 years). The GCB and electricity from grid mix system is presented as a reference system and is set as 100%.

| Impact category <sup>1</sup> | Reference System:<br>GCB & Grid mix | Basis Scenario<br>1991 - 2000<br>(83038 h) | Basis Scenario<br>1991 - 2000<br>(41519 h) |
|------------------------------|-------------------------------------|--------------------------------------------|--------------------------------------------|
| GWP [kg CO2 eq.]             | 6.56E+04                            | 1.55E+04                                   | 1.52E+04                                   |
| AP [kg SO2 eq.]              | 5.34E+01                            | 2.00E+01                                   | 2.32E+01                                   |
| EP [kg Phosphate eq.]        | 9.01E+00                            | 2.16E+00                                   | 1.91E+00                                   |
| ODP [kg R11 eq.]             | 6.78E-07                            | 2.12E-07                                   | 4.18E-07                                   |
| POCP [kg Ethene eq.]         | 5.21E+00                            | 2.83E+00                                   | 2.87E+00                                   |
| ADP fossil [MJ]              | 9.05E+05                            | 8.77E+05                                   | 8.77E+05                                   |
| ADP elements [kg Sb eq.]     | 3.14E-01                            | 6.81E-01                                   | 1.05E+00                                   |
| FAETP [kg DCB eq.]           | 8.26E+01                            | 7.31E+01                                   | 1.01E+02                                   |
| HTP [kg DCB eq.]             | 1.13E+04                            | 1.08E+04                                   | 1.14E+04                                   |
| MAETP [kg DCB eq.]           | 3.53E+06                            | 3.47E+05                                   | 1.11E+05                                   |
| TETP [kg DCB eq.]            | 8.05E+01                            | 8.25E+01                                   | 8.07E+01                                   |
| PED net cal. value [MJ]      | 1.26E+06                            | 8.43E+05                                   | 8.21E+05                                   |

<sup>1</sup> Global Warming Potential (GWP 100 years) [kg CO2 eq.]; Acidification Potential (AP) [kg SO2 eq.]; Eutrophication Potential (EP) [kg Phosphate eq.]; Ozone Layer Depletion Potential (ODP, steady state) [kg R11 eq.]; Photochem. Ozone Creation Potential (POCP) [kg Ethene eq.]; Abiotic Depletion (ADP fossil) [MJ]; Abiotic Depletion (ADP elements) [kg Sb eq.]; Freshwater Aquatic Ecotoxicity Pot. (FAETP inf.) [kg DCB eq.]; Human Toxicity Potential (HTP inf.) [kg DCB eq.]; Marine Aquatic Ecotoxicity Pot. (MAETP inf.) [kg DCB eq.]; Terrestrial Ecotoxicity Potential (TETP inf.) [kg DCB eq.]; Primary energy demand from ren. and non ren. resources (net cal. value) (PED) [MJ]

## References

1. Viesmann, Technologie-Broschüre. Stromerzeugende Heizungen VITOVALOR. 2021.
2. Wu, J., et al., A review of PEM fuel cell durability: Degradation mechanisms and mitigation strategies. Journal of Power Sources, 2008. 184(1): p. 104-119.
3. Dodds, P.E., et al., Hydrogen and fuel cell technologies for heating, in International Journal of Hydrogen Energy. 2015. p. 2065-2083.
4. Ahn, S.Y., et al., Performance and lifetime analysis of the kW-class PEMFC stack. Journal of Power Sources, 2002. 106(1): p. 295-303.
5. Wong, K.H. and E. Kjeang, Mitigation of Chemical Membrane Degradation in Fuel Cells: Understanding the Effect of Cell Voltage and Iron Ion Redox Cycle. ChemSusChem, 2015. 8(6): p. 1072-1082.
6. DESTATIS, S.B., Private Haushalte - Umweltökonomische Gesamtberechnungen 2019.
7. Uwe Bigalke, Y.Z., Jan Kunde, Martina Schmitt, Yang Zeng, Henning Discher, Katharina Bensmann, Christian Stolte, Der dena-Gebäudereport 2015. Statistiken und Analysen zur Energieeffizienz im Gebäudebestand. . 2015, Deutsche Energie-Agentur GmbH (dena): Berlin
8. Wong, K.H., Mitigation of Chemical Membrane Degradation in Fuel Cells: Understanding the Effect of Cell Voltage and Iron Ion Redox Cycle. Chemistry Europe 2015(8): p. 1072-1082.
